# Supplementary material for: Distribution of Homozygosity Regions in the Genome of Kazakh Cattle Breeds
Source: MDPI journal article supplement (doi:10.3390/d14040279), 2022-04-08
Supplement: s1 [file s1]

Archive with 1 entries (1 files):
- diversity-1617459 Supplementary.pdf
