# Supplementary material for: Distribution of Homozygosity Regions in the Genome of Kazakh Cattle Breeds
Source: MDPI journal article supplement (doi:10.3390/d14040279), 2022-04-08
Supplement: s1 [file s1 › diversity-1617459 Supplementary.pdf]

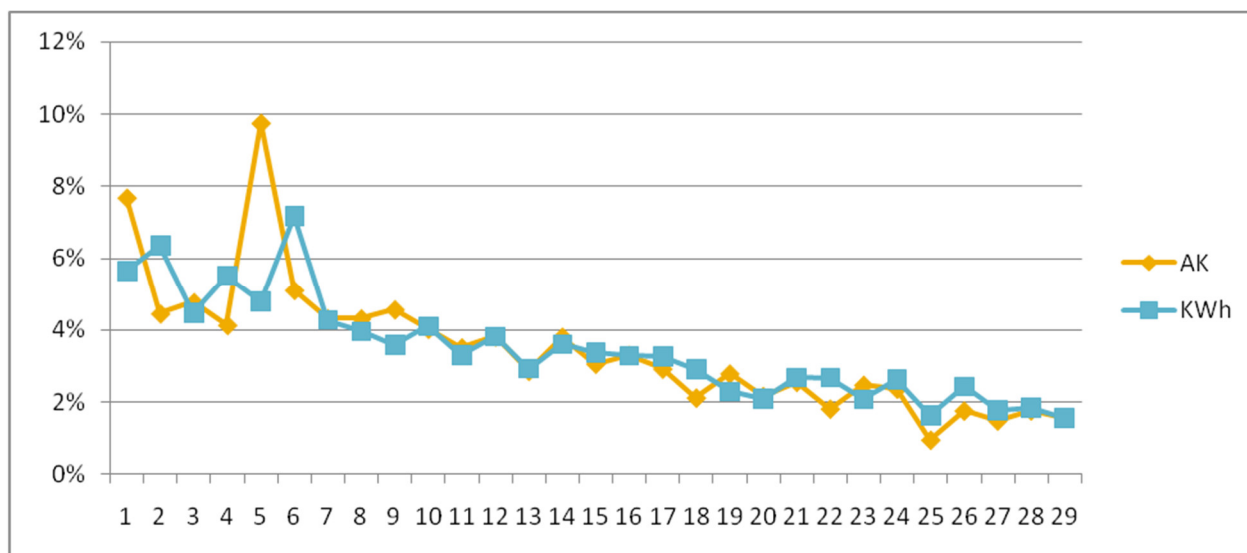

**Figure S1.** The percent distribution of ROH per chromosome in the two cattle populations.

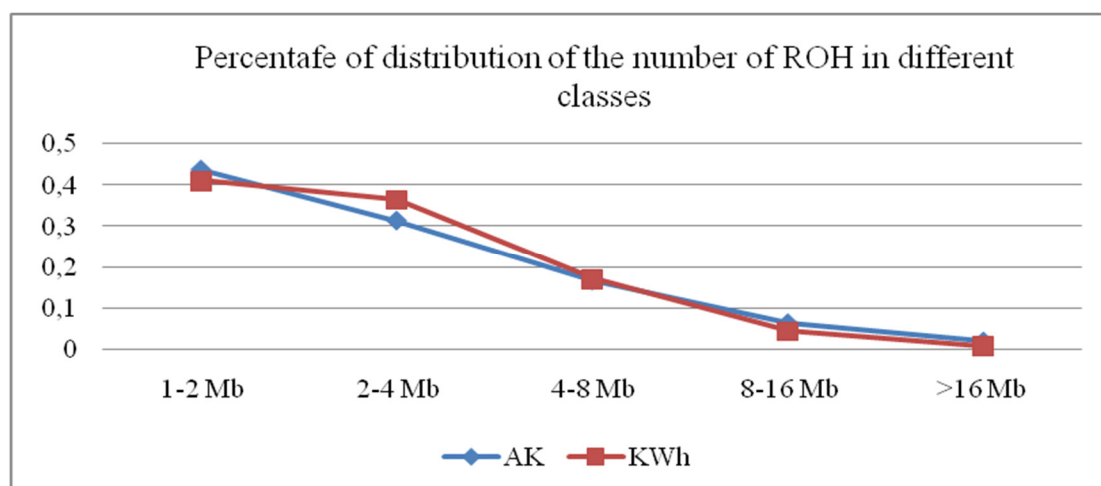

**Figure S2.** Percentage of distribution of the number of ROH in different classes.

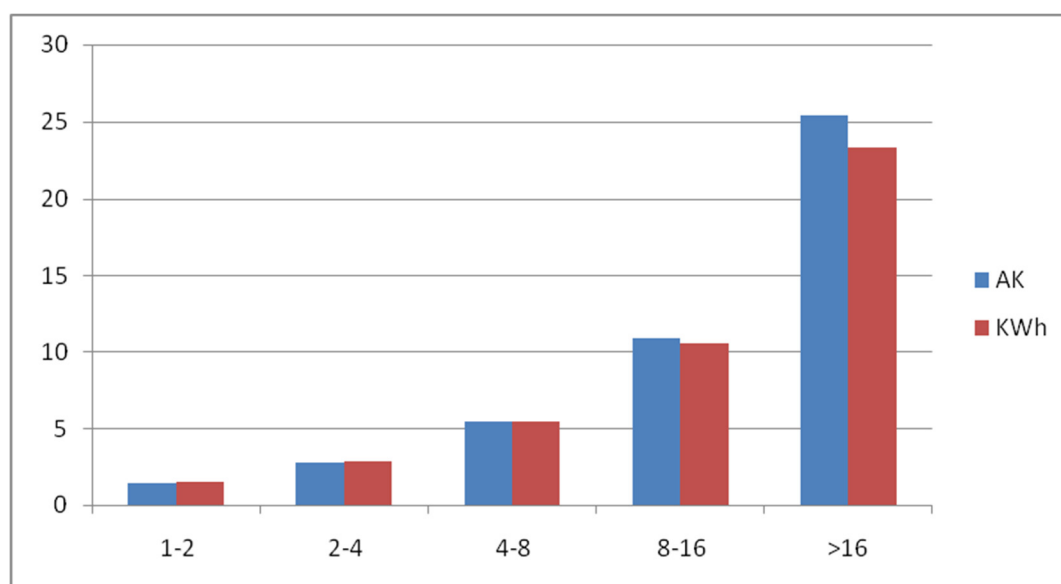

Figure S3. The mean length of runs per size class.

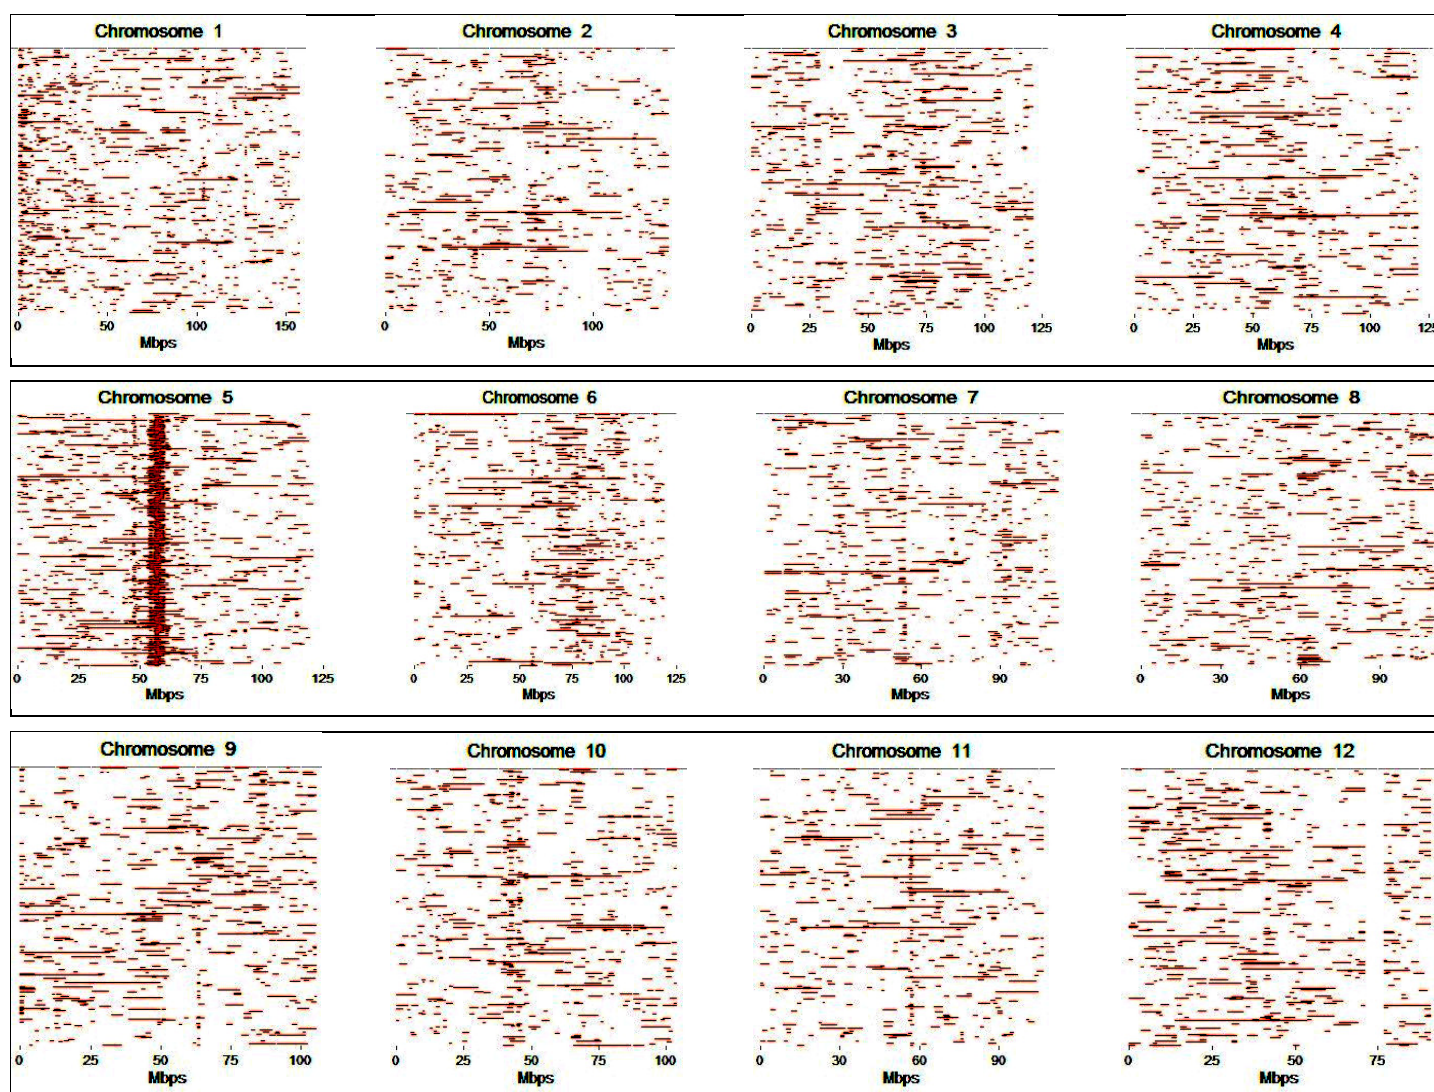

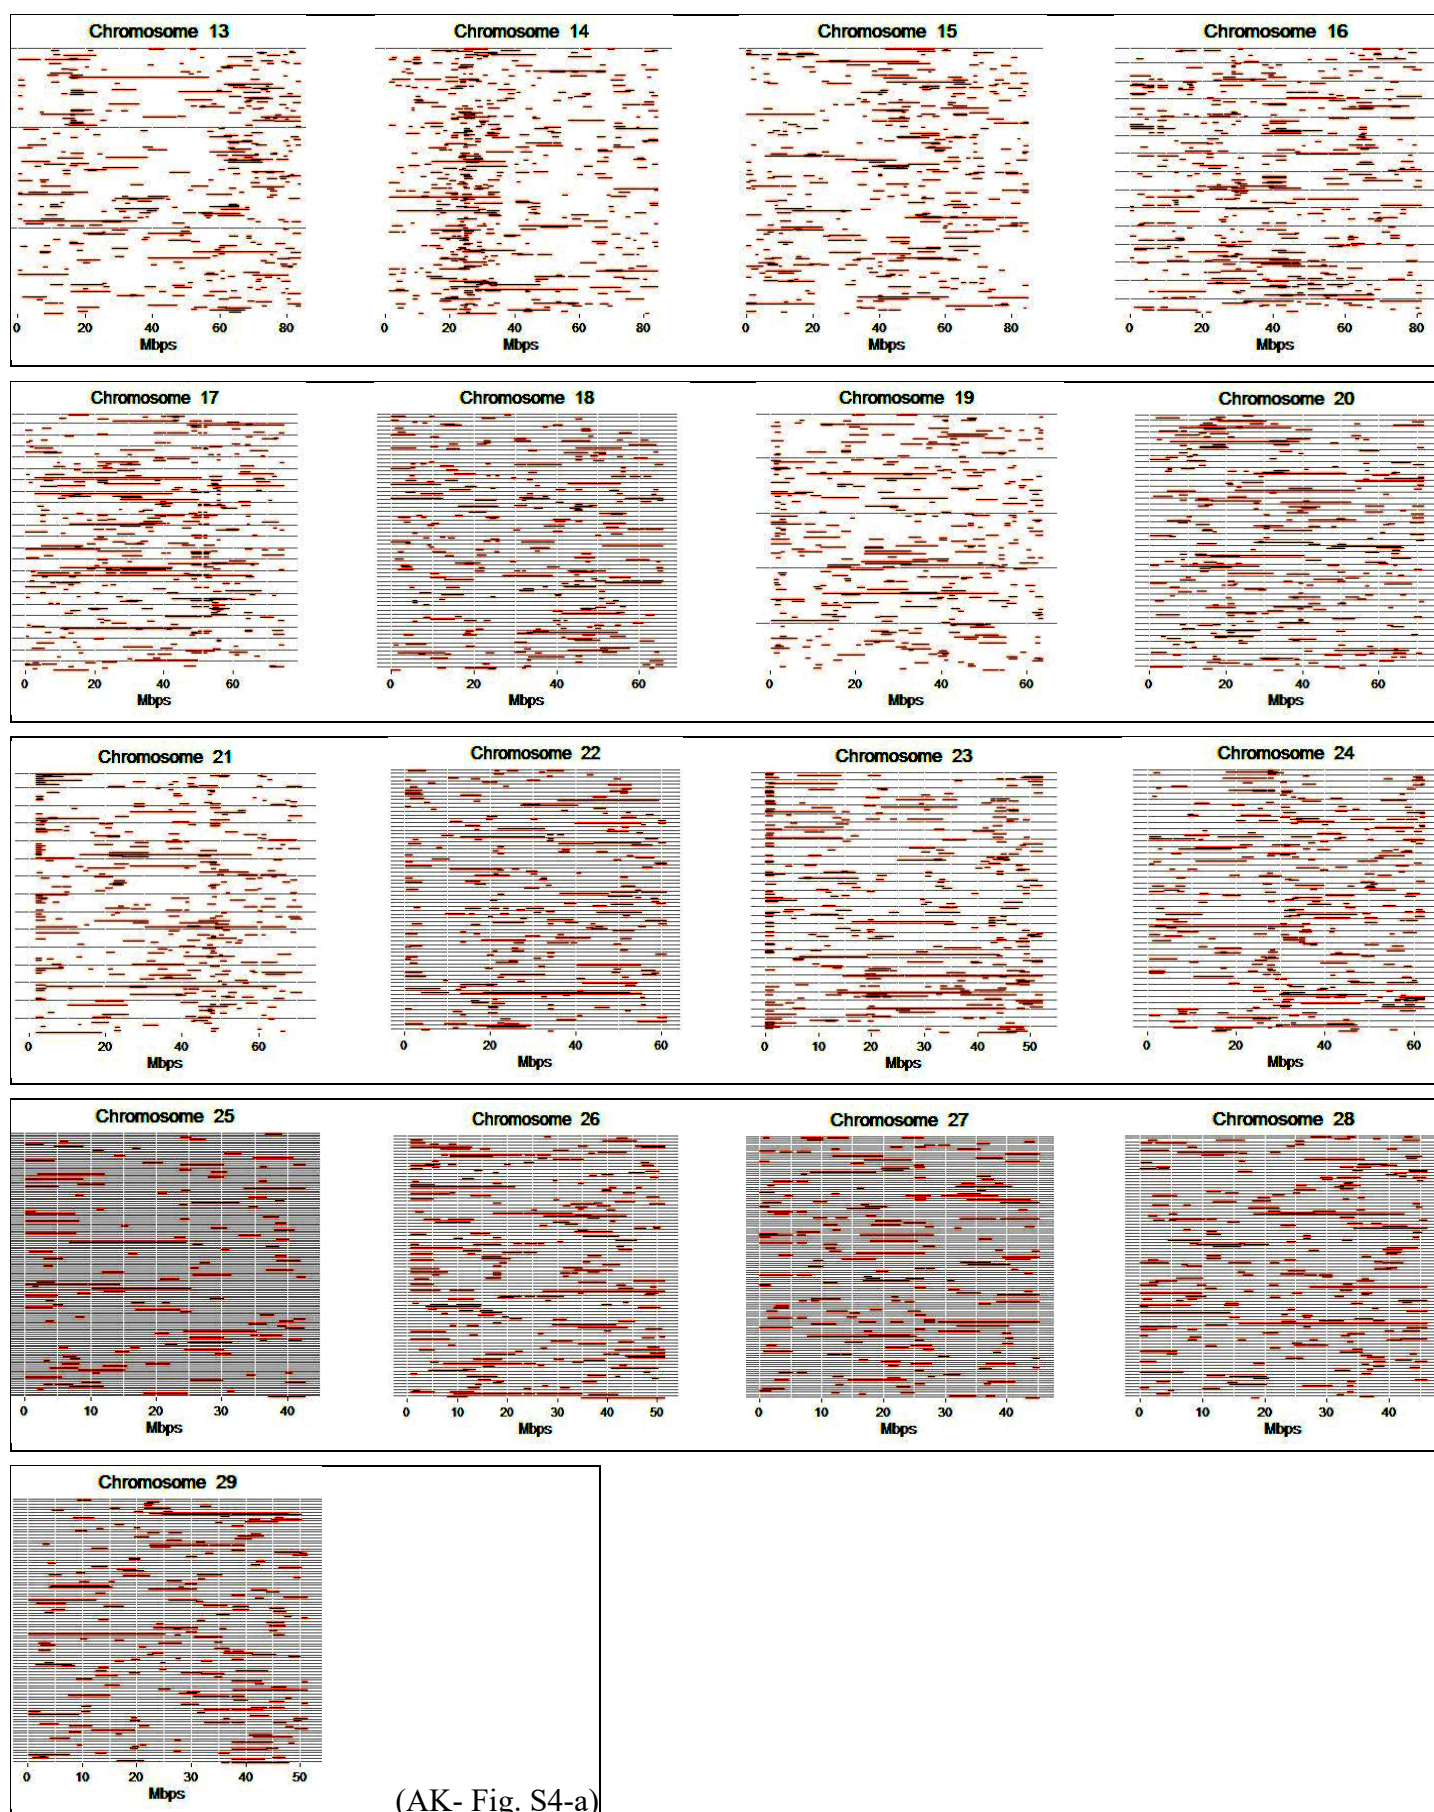

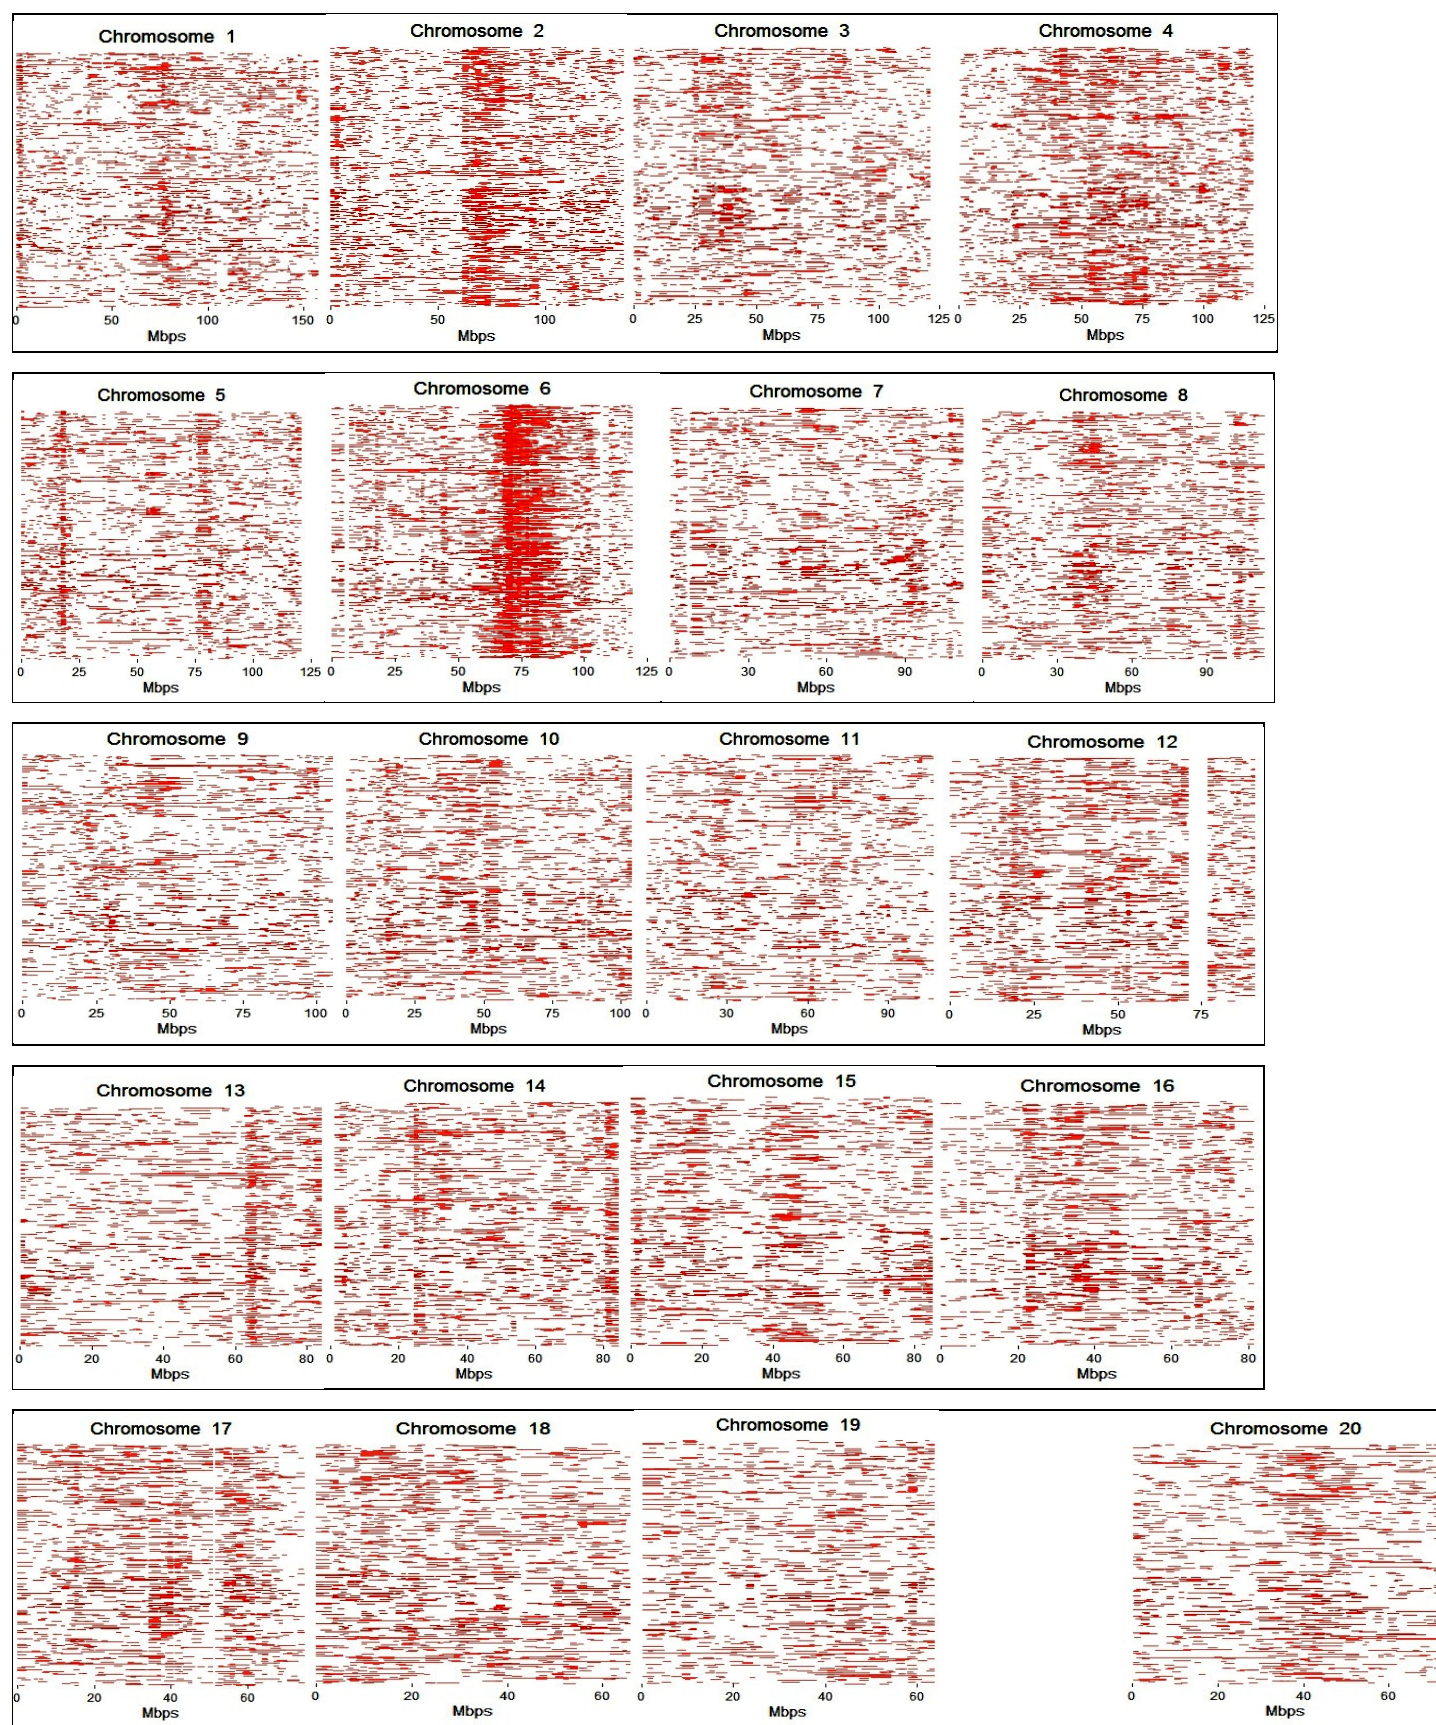

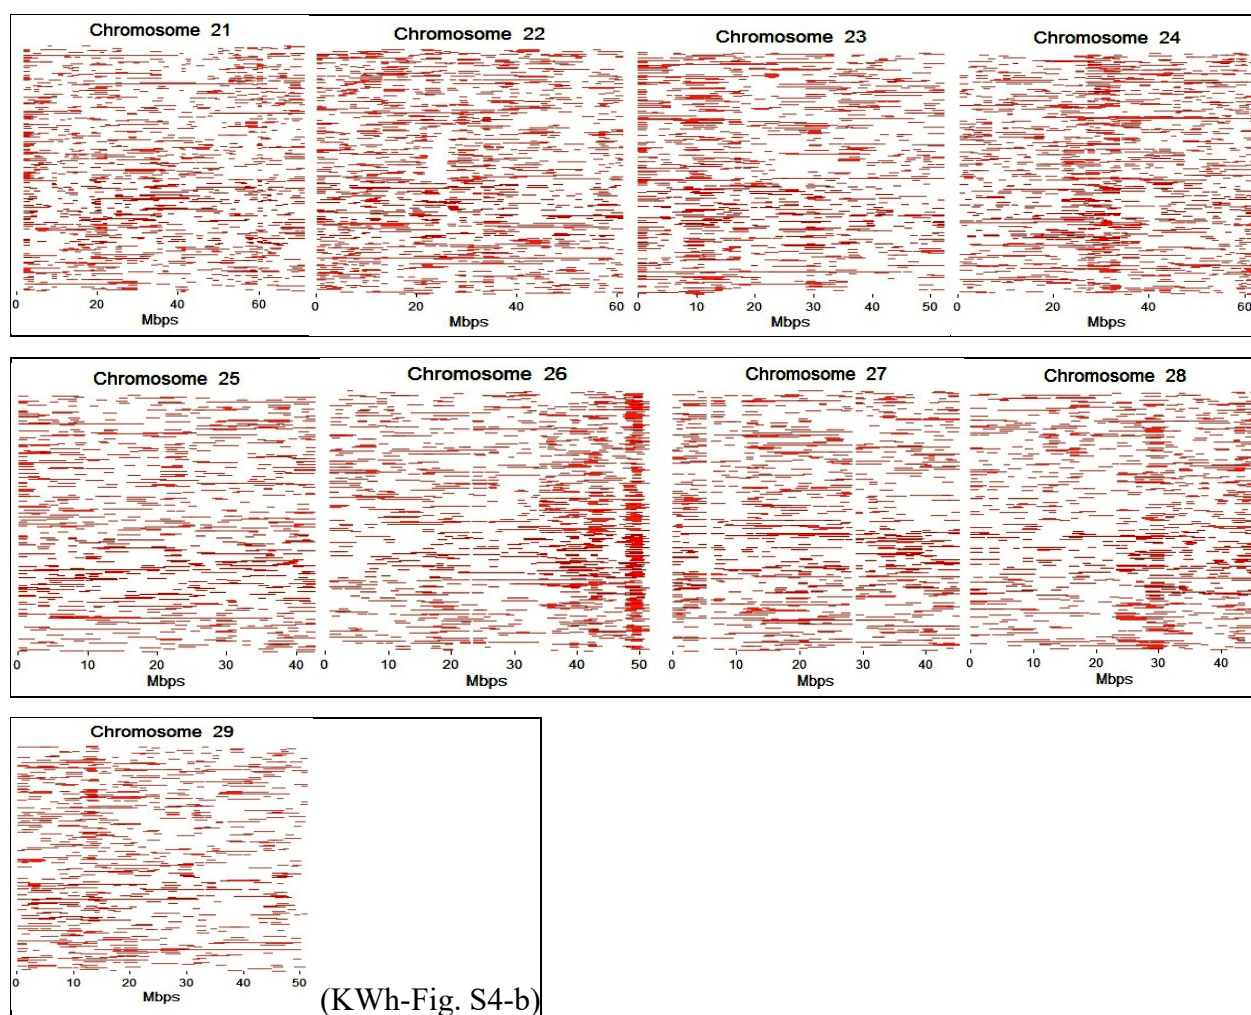

**Figure S4.** (a) and (b) The detected ROH segments in each individual against their position along the chromosome.
